# Supplementary material
Source: PubMed Central journal article supplement (PMC8481434)
Supplement: 11606_2021_7066_MOESM2_ESM.pdf [file 11606_2021_7066_MOESM2_ESM.pdf]

## Appendix

### List of the SEMI-COVID-19 Network members

**Coordinator of the SEMI-COVID-19 Registry:** José Manuel Casas Rojo

**SEMI-COVID-19 Scientific Committee Members:**

José Manuel Casas Rojo, José Manuel Ramos Rincón, Carlos Lumbreras Bermejo, Jesús Millán Núñez-Cortés, Juan Miguel Antón Santos, Ricardo Gómez Huelgas.

**Members of the SEMI-COVID-19 Group:**

H. Univ. de Bellvitge. L'Hospitalet de Llobregat (Barcelona)

Xavier Corbella, Narcís Homs, Abelardo Montero, Jose María Mora-Luján, Manuel Rubio-Rivas.

H. U. 12 de Octubre. Madrid

Paloma Agudo de Blas, Coral Arévalo Cañas, Blanca Ayuso, José Bascuñana Morejón, Samara Campos Escudero, María Carnevali Frías, Santiago Cossio Tejido, Borja de Miguel Campo, Carmen Díaz Pedroche, Raquel Diaz Simon, Ana García Reyne, Lucía Jorge Huerta, Antonio Lalueza Blanco, Jaime Laureiro Gonzalo, Jaime Lora-Tamayo, Carlos Lumbreras Bermejo, Guillermo Maestro de la Calle, Barbara Otero Perpiña, Diana Paredes Ruiz, Marcos Sánchez Fernández, Javier Tejada Montes.

H. U. Gregorio Marañón. Madrid

Laura Abarca Casas, Álvaro Alejandro de Oña, Rubén Alonso Beato, Leyre Alonso Gonzalo, Jaime Alonso Muñoz, Crhstian Mario Amodeo Oblitas, Cristina Ausín García, Marta Bacete Cebrián, Jesús Baltasar Corral, Maria Barrientos Guerrero, Alejandro D. Bendala Estrada, María Calderón Moreno, Paula Carrascosa Fernández, Raquel Carrillo, Sabela Castañeda Pérez, Eva Cervilla Muñoz, Agustín Diego Chacón Moreno, Maria Carmen Cuenca Carvajal, Sergio de Santos, Andrés Enríquez Gómez, Eduardo Fernández Carracedo, María Mercedes Ferreiro-Mazón Jenaro, Francisco Galeano Valle, Alejandra Garcia, Irene Garcia Fernandez-Bravo, María Eugenia García Leoni, María Gómez Antúnez, Candela González San Narciso, Anthony Alexander Gurjian, Lorena Jiménez Ibáñez, Cristina Lavilla Olleros,

1 Cristina Llamazares Mendo, Sara Luis García, Víctor Mato Jimeno, Clara Millán Nohales, Jesús Millán Núñez-Cortés,  
2 Sergio Moragón Ledesma, Antonio Muiño Míguez, Cecilia Muñoz Delgado, Lucía Ordieres Ortega, Susana Pardo  
3 Sánchez, Alejandro Parra Virto, María Teresa Pérez Sanz, Blanca Pinilla Llorente, Sandra Piqueras Ruiz, Guillermo  
4 Soria Fernández-Llamazares, María Toledano Macías, Neera Toledo Samaniego, Ana Torres do Rego, Maria Victoria  
5 Villalba Garcia, Gracia Villarreal, María Zurita Etayo.

#### 6 7 H. de Cabueñes. Gijón (Asturias)

8 Ana María Álvarez Suárez, Carlos Delgado Vergés, Rosa Fernandez-Madera Martínez, Eva M<sup>a</sup> Fonseca Aizpuru,  
9 Alejandro Gómez Carrasco, Cristina Helguera Amezua, Juan Francisco López Caleyá, María del Mar Martínez López,  
10 Aleida Martínez Zapico, Carmen Olabuenaga Iscar, María Luisa Taboada Martínez, Lara María Tamargo Chamorro.

#### 11 12 H. U. La Paz. Madrid

13 Jorge Álvarez Troncoso, Francisco Arnalich Fernández, Francisco Blanco Quintana, Carmen Busca Arenzana, Sergio  
14 Carrasco Molina, Aranzazu Castellano Candalija, Germán Daroca Bengoa, Alejandro de Gea Grela, Alicia de Lorenzo  
15 Hernández, Alejandro Díez Vidal, Carmen Fernández Capitán, Maria Francisca García Iglesias, Borja González Muñoz,  
16 Carmen Rosario Herrero Gil, Juan María Herrero Martínez, Víctor Hontañón, María Jesús Jaras Hernández, Carlos  
17 Lahoz, Cristina Marcelo Calvo, Juan Carlos Martín Gutiérrez, Monica Martinez Prieto, Elena Martínez Robles, Araceli  
18 Menéndez Saldaña, Alberto Moreno Fernández, Jose Maria Mostaza Prieto, Ana Noblejas Mozo, Carlos Manuel  
19 Oñoro López, Esmeralda Palmier Peláez, Marina Palomar Pampyn, Maria Angustias Quesada Simón, Juan Carlos  
20 Ramos Ramos, Luis Ramos Ruperto, Aquilino Sánchez Purificación, Teresa Sancho Bueso, Raquel Sorriguieta Torre,  
21 Clara Itziar Soto Abanedes, Yeray Untoria Tabares, Marta Varas Mayoral, Julia Vásquez Manau.

#### 22 23 24 25 H. Costa del Sol. Marbella (Málaga)

26 Victoria Augustín Bandera, Javier García Alegría, Nicolás Jiménez-García, Jairo Luque del Pino, María Dolores Martín  
27 Escalante, Francisco Navarro Romero, Victoria Nuñez Rodriguez, Julián Olalla Sierra.

#### 28 29 H. Royo Villanova. Zaragoza

30 Nicolás Alcalá Rivera, Anxela Crestelo Vieitez, Esther del Corral Beamonte, Jesús Díez Manglano, Isabel Fiteni Mera,  
31 Maria del Mar Garcia Andreu, Martin Gericó Aseguinolaza, Claudia Josa Laorden, Raul Martínez Murgui, Marta  
32 Teresa Matía Sanz.

#### 33 34 H. Clínico de Santiago de Compostela (A Coruña)

35 Maria del Carmen Beceiro Abad, Maria Aurora Freire Romero, Sonia Molinos Castro, Emilio Manuel Paez Guillan,  
36 María Pazo Nuñez, Paula Maria Pesqueira Fontan.

#### 37 38 H. Clínico San Carlos. Madrid

39 Inés Armenteros Yeguas, Javier Azaña Gómez, Julia Barrado Cuchillo, Irene Burruezo López, Noemí Cabello Clotet,  
40 Alberto E. Calvo Elías, Elpidio Calvo Manuel, Carmen María Cano de Luque, Cynthia Chocron Benbunan, Laura Dans  
41 Vilan, Claudia Dorta Hernández, Ester Emilia Dubon Peralta, Vicente Estrada Pérez, Santiago Fernandez-Castelao,  
42 Marcos Oliver Fragiél Saavedra, José Luis García Klepzig, Maria del Rosario Iguarán Bermúdez, Esther Jaén Ferrer,  
43 Alejandro Maceín Rodríguez, Alejandro Marcelles de Pedro, Rubén Ángel Martín Sánchez, Manuel Méndez Bailón,  
44 Sara Miguel Álvarez, Maria José Nuñez Orantos, Carolina Olmos Mata, Eva Orviz García, David Oteo Mata, Cristina  
45 Outon González, Juncal Perez-Somarriba, Pablo Pérez Mateos, Maria Esther Ramos Muñoz, Xabier Rivas Regaira,  
46 Laura M<sup>a</sup> Rodríguez Gallardo, Iñigo Sagastagoitia Fornie, Alejandro Salinas Botrán, Miguel Suárez Robles, Maddalena  
47 Elena Urbano, Andrea María Vellisca González, Miguel Villar Martínez.

#### 48 49 H. Universitario Dr. Peset. Valencia

50 Juan Alberto Aguilera Ayllón, Arturo Artero, María del Mar Carmona Martín, María José Fabiá Valls, Maria de Mar  
51 Fernández Garcés, Ana Belén Gómez Belda, Ian López Cruz, Manuel Madrazo López, Elisabeth Mateo Sanchis, Jaume  
52 Micó Gandia, Laura Piles Roger, Adela Maria Pina Belmonte, Alba Viana García.

#### 53 54 H. U. La Princesa. Madrid

55 María Aguilera García, Ester Alonso Monge, Jesús Álvarez Rodríguez, Claudia Alvarez Varela, Miquel Berniz Gòdia,  
56 Marta Briega Molina, Marta Bustamante Vega, Jose Curbelo, Alicia de las Heras Moreno, Ignacio Descalzo Godoy,

1 Alexia Constanza Espiño Alvarez, Ignacio Fernández Martín-Caro, Alejandra Franquet López-Mosteiro, Gonzalo  
2 Galvez Marquez, María José García Blanco, Yaiza García del Álamo Hernández, Clara García-Rayó Encina, Noemí  
3 Gilabert González, Carolina Guillermo Rodríguez, Nicolás Labrador San Martín, Manuel Molina Báez, Carmen Muñoz  
4 Delgado, Pedro Parra Caballero, Javier Pérez Serrano, Laura Rabes Rodríguez, Pablo Rodríguez Cortés, Carlos  
5 Rodríguez Franco, Emilia Roy-Vallejo, Monica Rueda Vega, Aresio Sancha Lloret, Beatriz Sánchez Moreno, Marta Sanz  
6 Alba, Jorge Serrano Ballesteros, Alba Somovilla, Carmen Suarez Fernández, Macarena Vargas Tirado, Almudena Villa  
7 Marti.

#### 8 9 H. U. Puerta de Hierro. Madrid

10 María Álvarez Bello, Ane Andrés Eisenhofer, Ana Arias Milla, Isolina Baños Pérez, Laura Benítez Gutiérrez, Javier  
11 Bilbao Garay, Silvia Blanco Alonso, Jorge Calderón Parra, Alejandro Callejas Díaz, José María Camino Salvador, M<sup>a</sup>  
12 Cruz Carreño Hernández, Valentín Cuervas-Mons Martínez, Sara de la Fuente Moral, Miguel del Pino Jimenez,  
13 Alberto Díaz de Santiago, Itziar Diego Yagüe, Ignacio Donate Velasco, Ana María Duca, Pedro Durán del Campo,  
14 Gabriela Escudero López, Esther Expósito Palomo, Ana Fernández Cruz, Esther Fiz Benito, Andrea Fraile López, Amy  
15 Galán Gómez, Sonia García Prieto, Claudia García Rodríguez-Maimón, Miguel Ángel García Viejo, Javier Gómez Irusta,  
16 Edith Vanessa Gutiérrez Abreu, Isabel Gutiérrez Martín, Ángela Gutiérrez Rojas, Andrea Gutiérrez Villanueva, Jesús  
17 Herráiz Jiménez, Pedro Laguna del Estal, M<sup>a</sup> Carmen Máinez Sáiz, Cristina Martín Martín, María Martínez  
18 Urbistondo, Fernando Martínez Vera, Susana Mellor Pita, Patricia Mills Sánchez, Esther Montero Hernández, Alberto  
19 Mora Vargas, Cristina Moreno López, Alfonso Ángel-Moreno Maroto, Victor Moreno-Torres, Concha, Ignacio Morrás  
20 De La Torre, Elena Muñoz Rubio, Rosa Muñoz de Benito, Ana Muñoz Gómez, Alejandro Muñoz Serrano, Jose María  
21 Palau Fayós, Lina Marcela Parra Ramírez, Ilduara Pintos Pascual, Arturo José Ramos Martín-Vegue, Antonio Ramos  
22 Martínez, Isabel Redondo Cánovas del Castillo, Alberto Roldán Montaud, Lucía Romero Imaz, Yolanda Romero  
23 Pizarro, Enrique Sánchez Chica, David Sánchez Órtiz, Mónica Sánchez Santiuste, Patricia Serrano de la Fuente, Pablo  
24 Tutor de Ureta, Ángela Valencia Alijo, Mercedes Valentín-Pastrana Aguilar, Juan Antonio Vargas Núñez, Jose Manuel  
25 Vázquez Comendador, Gema Vázquez Contreras, Carmen Vizoso Gálvez.

#### 26 27 H. Reg. Univ. de Málaga

28 M<sup>a</sup> Mar Ayala-Gutiérrez, Rosa Bernal López, José Bueno Fonseca, Verónica Andrea Buonaiuto, Luis Francisco  
29 Caballero Martínez, Lidia Cobos Palacios, Clara Costo Muriel, Francis de Windt, Ana Teresa Fernandez-Truchaud  
30 Christophel, Paula García Ocaña, Ricardo Gómez Huelgas, Javier Gorospe García, Sergio Jansen-Chaparro, Maria  
31 Dolores López-Carmona, Pablo López Quirantes, Almudena López Sampalo, Elizabeth Lorenzo-Hernández, Juan José  
32 Mancebo Sevilla, Jesica Martín Carmona, Luis Miguel Pérez-Belmonte, Iván Pérez de Pedro, Araceli Pineda-Cantero,  
33 Carlos Romero Gómez, Michele Ricci, Jaime Sanz Cánovas.

#### 34 35 H. Moisès Broggi. Sant Joan Despí (Barcelona)

36 Judit Aranda Lobo, Lucía Feria Casanovas, Jose Loureiro Amigo, Miguel Martín Fernández, Isabel Oriol Bermúdez,  
37 Melani Pestaña Fernández, Nicolas Rhyman, Nuria Vázquez Piqueras.

#### 38 39 H. U. Río Hortega. Valladolid

40 Irene Arroyo Jiménez, Marina Cazorla González, Marta Cobos-Siles, Luis Corral-Gudino, Pablo Cubero-Morais, María  
41 González Fernández, José Pablo Miramontes González, Marina Prieto Dehesa, Pablo Sanz Espinosa.

#### 42 43 H. Nuestra Señora del Prado. Talavera de la Reina (Toledo)

44 Sonia Casallo Blanco, Jeffrey Oskar Magallanes Gamboa, Cristina Salazar Mosteiro, Andrea Silva Asiain.

#### 45 46 H. U. S. Juan de Alicante (Alicante)

47 Marisa Asensio Tomás, David Balaz, David Bonet Tur, Ruth Cañizares Navarro, Paloma Chazarra Pérez, Jesús  
48 Corbacho Redondo, Eliana Damonte White, Leticia Espinosa Del Barrio, Pedro Jesús Esteve Atiénzar, Carles García  
49 Cervera, David Francisco García Núñez, Vicente Giner Galvañ, Angie Gómez Uranga, Javier Guzmán Martínez, Isidro  
50 Hernández Isasi, Lourdes Lajara Villar, Verónica Martínez Sempere, Juan Manuel Núñez Cruz, Sergio Palacios  
51 Fernández, Juan Jorge Peris García, Andrea Riaño Pérez, José Miguel Seguí Ripoll, Azucena Sempere Mira, Philip  
52 Wikman-Jorgensen.

#### 53 54 H. Virgen de la Salud. Toledo

55 Ana Maria Alguacil Muñoz, Marta Blanco Fernández, Veronica Cano, Ricardo Crespo Moreno, Fernando Cuadra  
56 Garcia-Tenorio, Blanca Díaz-Tendero Nájera, Raquel Estévez González, María Paz García Butenegro, Alberto Gato

1 Díez, Verónica Gómez Caverzaschi, Piedad María Gómez Pedraza, Julio González Moraleja, Raúl Hidalgo Carvajal,  
2 Patricia Jiménez Aranda, Raquel Labra González, Áxel Legua Caparachini, Pilar Lopez Castañeyra, Agustín Lozano  
3 Ancin, Jose Domingo Martin Garcia, Cristina Morata Romero, María Jesús Moya Saiz, Helena Moza Moríñigo, Gemma  
4 Muñiz Nicolás, Enriqueta Muñoz Platon, Filomena Oliveri, Elena Ortiz Ortiz, Raúl Perea Rafael, Pilar Redondo Galán,  
5 María Antonia Sepulveda Berrocal, Vicente Serrano Romero de Ávila, Pilar Toledano Sierra, Yamilex Urbano Aranda,  
6 Jesús Vázquez Clemente, Carmen Yera Bergua.

#### 7 8 H. U. Reina Sofía. Córdoba

9 Antonio Pablo Arenas de Larriva, Pilar Calero Espinal, Javier Delgado Lista, Francisco Fuentes-Jiménez, María Jesús  
10 Gómez Vázquez, Jose Jiménez Torres, Laura Limia Pérez, José López-Miranda, Laura Martín Piedra, Marta Millán  
11 Orge, Javier Pascual Vinagre, Pablo Pérez-Martinez, María Elena Revelles Vílchez, Angela Rodrigo Martínez, Juan Luis  
12 Romero Cabrera, José David Torres-Peña.

#### 13 14 C. H. U. de Badajoz

15 Rafael Aragon Lara, Inmaculada Cimadevilla Fernandez, Juan Carlos Cira García, Gema Maria García García, Julia  
16 Gonzalez Granados, Beatriz Guerrero Sánchez, Francisco Javier Monreal Periañez, Maria Josefa Pascual Perez.

#### 17 18 H. Santa Marina. Bilbao

19 María Areses Manrique, Ainara Coduras Erdozain, Ane Labirua-Iturburu Ruiz.

#### 20 21 H. Juan Ramón Jiménez. Huelva

22 Francisco Javier Bejarano Luque, Francisco-Javier Carrasco-Sánchez, Mercedes de-Sousa-Baena, Jaime Díaz Leal,  
23 Aurora Espinar Rubio, Maria Franco Huertas, Juan Antonio García Bravo, Andrés Gonzalez Macías, Encarnación  
24 Gutiérrez Jiménez, Alicia Hidalgo Jiménez, Constantino Lozano Quintero, Carmen Mancilla Reguera, Francisco Javier  
25 Martínez Marcos, Francisco Muñoz Beamud, Maria Pérez-Aguilar, Alícia Pérez Jiménez, Virginia Rodríguez Castaño,  
26 Alvaro Sánchez de Alcazar del Río, Leire Toscano Ruiz.

#### 27 28 H. U. Son Llàtzer. Palma de Mallorca

29 Andrés de la Peña Fernández, Almudena Hernández Milián.

#### 30 31 H. del Henares. Coslada (Madrid)

32 Jesús Ballano Rodríguez-Solís, Luis Cabeza Osorio, María del Pilar Fidalgo Montero, M<sup>a</sup> Isabel Fuentes Soriano, Erika  
33 Esperanza Lozano Rincón, Ana Martín Hermida, Jesús Martínez Carrilero, José Ángel Pestaña Santiago, Manuel  
34 Sánchez Robledo, Patricia Sanz Rojas, Nahum Jacobo Torres Yebes, Vanessa Vento.

#### 35 36 H. U. Ramón y Cajal. Madrid

37 Luis Fernando Abrego Vaca, Ana Andréu Arnanz, Octavio Arce García, Marta Bajo González, Pablo Borque Sanz,  
38 Alberto Cozar Llisto, Sonia de Pedro Baena, Beatriz Del Hoyo Cuenda, Martin Fabregate-Fuente, María Alejandra  
39 Gamboa Osorio, Isabel García Sánchez, Andrés González García, Oscar Alberto López Cisneros, Luis Manzano, Miguel  
40 Martínez-Lacalzada, Borja Merino Ortiz, Jimena Rey-García, Elisa Riera González, Cristina Sánchez Díaz, Grisell Starita  
41 Fajardo, Cecilia Suárez Carantoña, Adrian Viteri-Noël, Svetlana Zhilina Zhilina.

#### 42 43 H. U. Infanta Cristina. Parla (Madrid)

44 Gonzalo García Casasola Sánchez, Juan Miguel Antón Santos, Elena Sierra Gonzalo, Elena Garcia Guijarro, José  
45 Manuel Casas Rojo, Lorea Roteta García, Davide Luordo, Ana Belén Barbero Barrera, María Mateos González, Irene  
46 Casado Lopez, Andrés Cortés Troncoso, Francesco Deodati, Javier Villanueva Martínez, Ruth Calderón Hernaiz, Mayte  
47 De Guzmán García-Monge, Coralía Bueno Muiño, Jose A Melero Bermejo.

#### 48 49 H. U. Torrevieja (Alicante)

50 Julio César Blázquez Encinar.

#### 51 52 C. H. U. Ourense

53 Raquel Fernández González, Amara Gonzalez Noya, Carlos Hernández Ceron, Isabel Izuzquiza Avanzini, Ana Latorre  
54 Díez, Pablo López Mato, Ana María Lorenzo Vizcaya, Daniel Peña Benítez, Milagros María Peña Zemsch, Lucía Pérez  
55 Expósito, Marta Pose Bar, Lara Rey González, Laura Rodrigo Lara.

1 H. San Pedro. Logroño (La Rioja)

2 Diana Alegre González, Irene Ariño Pérez de Zabalza, Sergio Arnedo Hernández, Jorge Collado Sáenz, Beatriz  
3 Dendariena, Marta Gómez del Mazo, Iratxe Martínez de Narvajás Urra, Sara Martínez Hernández, Estela Menendez  
4 Fernández, Jose Luís Peña Somovilla, Elisa Rabadán Pejenaute.

5  
6 H. U. La Fe. Valencia

7 Dafne Cabañero, María Calabuig Ballester, Pascual Císcar Fernández, Ricardo Gil Sánchez, Marta Jiménez Escrig,  
8 Cristina Marín Amela, Laura Parra Gómez, Carlos Puig Navarro, José Antonio Todolí Parra.

9  
10 H. de Mataró. Barcelona

11 Raquel Aranega González, Ramon Boixeda, Javier Fernández Fernández, Carlos Lopera Mármol, Marta Parra Navarro,  
12 Ainhoa Rex Guzmán, Aleix Serrallonga Fustier.

13  
14 H. Alto Guadalquivir. Andújar (Jaén)

15 Begoña Cortés Rodríguez.

16  
17 H. de Sagunto (Valencia)

18 Enrique Rodilla Sala, Jose María Pascual Izuel, Zineb Karroud Zamrani.

19  
20 H. G. U. de Elda (Alicante)

21 Carmen Cortés Saavedra, Jennifer Fernández Gómez, Borja González López, María Soledad Hernández Garrido, Ana  
22 Isabel López Amorós, Santiago López Gil, María de los Reyes Pascual Pérez, Nuria Ramírez Perea, Andrea Torregrosa  
23 García.

24  
25 H. de Pozoblanco (Córdoba)

26 José Nicolás Alcalá Pedrajas, Antonia Márquez García, Inés Vargas.

27  
28 H. Infanta Margarita. Cabra (Córdoba)

29 María Esther Guisado Espartero, Lorena Montero Rivas, María de la Sierra Navas Alcántara, Raimundo Tirado-  
30 Miranda.

31  
32 C. H. U. de Ferrol (A Coruña)

33 Hortensia Álvarez Díaz, Tamara Dalama Lopez, Estefanía Martul Pego, Carmen Mella Pérez, Ana Pazos Ferro, Sabela  
34 Sánchez Trigo, Dolores Suarez Sambade, María Trigas Ferrin, María del Carmen Vázquez Friol, Laura Vilariño  
35 Maneiro.

36  
37 H. Marina Baixa. Villajoyosa (Alicante)

38 Javier Ena, José Enrique Gómez Segado.

39  
40 H. del Tajo. Aranjuez (Madrid)

41 Ruth Gonzalez Ferrer, Virginia Gracia Lorenzo, Raquel Monsalvo Arroyo.

42  
43 H. Dr. José Molina Orosa. Arrecife (Lanzarote)

44 Virginia Herrero García, Berta Román Bernal.

45  
46 H. U. Virgen del Rocío. Sevilla

47 Máximo Bernabeu-Wittel, Santiago Rodríguez Suárez, María Nieto, Luis Giménez Miranda, Rosa María Gámez  
48 Mancera, Fátima Espinosa Torre, Carlos Hernandez Quiles, Concepción Conde Guzmán, Juan Delgado de la Cuesta,  
49 Jara Eloisa Ternero Vega, María del Carmen López Ríos, Pablo Díaz Jiménez, Bosco Baron Franco, Carlos Jiménez de  
50 Juan, Sonia Gutiérrez Rivero, Julia Lanseros Tenllado, Verónica Alfaro Lara, Aurora González Estrada.

51  
52 H. U. Marqués de Valdecilla. Santander

53 Marta Fernández-Ayala Novo, José Javier Napal Lecumberri, Nuria Puente Ruiz, Jose Riancho, Isabel Sampedro  
54 García.

55  
56 H. U. Virgen de las Nieves. Granada

1 Pablo Conde Baena, Joaquín Escobar Sevilla, Laura Gallo Padilla, Patricia Gómez Ronquillo, Pablo González Bustos,  
2 María Navío Botías, Jessica Ramírez Taboada, Mar Rivero Rodríguez.

3  
4 H. General Defensa. Zaragoza

5 Anyuli Gracia Gutiérrez, Leticia Esther Royo Trallero.

6  
7 H. G. U. de Castellón

8 Jorge Andrés Soler, Marián Bennasar Remolar, Alejandro Cardenal Álvarez, Daniela Díaz Carlotti, María José Esteve  
9 Gimeno, Sergio Fabra Juana, Paula García López, María Teresa Guinot Soler, Daniela Palomo de la Sota, Guillem  
10 Pascual Castellanos, Ignacio Pérez Catalán, Celia Roig Martí, Paula Rubert Monzó, Javier Ruiz Padilla, Nuria Tornador  
11 Gaya, Jorge Usó Blasco.

12  
13 H. de Palamós (Girona)

14 Ana Alberich Conesa, Mari Cruz Almendros Rivas, Miquel Hortos Alsina, José Marchena Romero, Anabel Martin-Urda  
15 Diez-Canseco.

16  
17 C. A. U. de Salamanca

18 Gloria María Alonso Claudio, Víctor Barreales Rodríguez, Cristina Carbonell Muñoz, Adela Carpio Pérez, María  
19 Victoria Coral Orbes, Daniel Encinas Sánchez, Sandra Inés Revuelta, Miguel Marcos Martín, José Ignacio Martín  
20 González, José Ángel Martín Oterino, Leticia Moralejo Alonso, Sonia Peña Balbuena, María Luisa Pérez García, Ana  
21 Ramon Prados, Beatriz Rodríguez-Alonso, Ángela Romero Alegría, Maria Sanchez Ledesma, Rosa Juana Tejera Pérez.

22  
23 H. Platón. Barcelona

24 Ana Suárez Lombraña.

25  
26 H. Público de Monforte de Lemos (Lugo)

27 José López Castro, Manuel Lorenzo López Reboiro, Cristina Sardiña González.

28  
29 H. Santa Bárbara. Soria

30 Marta León Téllez.

31  
32 H. Parc Tauli. Sabadell (Barcelona)

33 Francisco Epelde, Isabel Torrente.

34  
35 H. U. Lucus Augusti. Lugo

36 Raquel Gómez Méndez, Ana Rodríguez Álvarez.

37  
38 H. Comarcal de Blanes (Girona)

39 Oriol Alonso Gisbert, Mercé Blázquez Llistosella, Pere Comas Casanova, Angels Garcia Flores, Anna Garcia Hinojo,  
40 Ana Inés Méndez Martínez, Maria del Carmen Nogales Nieves, Agnés Rivera Austrui, Alberto Zamora Cervantes.

41  
42 H. de la Axarquía. Vélez-Málaga (Málaga)

43 Antonio López Ruiz.

44  
45 H. do Salnes. Vilagarcía de Arousa (Pontevedra)

46 Vanesa Alende Castro, Ana María Baz Lomba, Ruth Brea Aparicio, Marta Fernández Morales, Jesús Manuel  
47 Fernández Villar, María Teresa López Monteagudo, Cristina Pérez García, Lorena Rodríguez Ferreira, Diana Sande  
48 Llovo, Maria Begoña Valle Feijoo.

49  
50 H. U. HM Montepíncipe

51 José F. Varona.
